1 Heat stress modifies the lactational performances and the  
2 urinary metabolomic profile related to gastrointestinal  
3 microbiota of dairy goats

4  
5 Alexandra Contreras-Jodar<sup>1¶</sup>, Nazri Nayan<sup>2¶</sup>, Soufiane Hamzaoui<sup>1,#b</sup>, Gerardo Caja<sup>1\*</sup>,  
6 Ahmed A.K. Salama<sup>1,#c¶\*</sup>

7  
8 <sup>1</sup> Group of Research in Ruminants (G2R), Department of Animal and Food Sciences,  
9 Universitat Autònoma de Barcelona, Bellaterra, Barcelona, Spain

10  
11 <sup>2</sup> Department of Animal Science, Faculty of Agriculture, University Putra Malaysia, Serdang,  
12 Selangor, Malaysia

13  
14 <sup>#b</sup> Current address: Department of Agronomic Science, University of Bouira, Bouira, Algeria

15  
16 <sup>#c</sup> Current address: Dairy and Food Science Department, South Dakota State University,  
17 Brookings, South Dakota, United States of America

18  
19  
20 \* Corresponding authors:

21 [gerardo.caja@uab.es](mailto:gerardo.caja@uab.es) (GC), [ahmed.salama@sdstate.edu](mailto:ahmed.salama@sdstate.edu) (AAKS)

22  
23 ¶These authors contributed equally to this work

24

25

26

27

## 28 **Abstract**

29 The aim of the study was to identify the candidate biomarkers of heat stress (HS) in the  
30 urine of lactating dairy goats through the application of proton Nuclear Magnetic  
31 Resonance ( $^1\text{H}$  NMR)-based metabolomic analysis. Dairy does ( $n = 16$ ) in mid-lactation  
32 were submitted to thermal neutral (TN; indoors; 15 to 20°C; 40 to 45% humidity) or HS  
33 (climatic chamber; 37°C day, 30°C night; 40% humidity) conditions according to a crossover  
34 design (2 periods of 21 days). Thermophysiological traits and lactational performances  
35 were recorded and milk composition analyzed during each period. Urine samples were  
36 collected at day 15 of each period for  $^1\text{H}$  NMR spectroscopy analysis. Principal component  
37 analysis (PCA) and partial least square–discriminant analysis (PLS-DA) assessment with  
38 cross validation were used to identify the goat urinary metabolome from Human  
39 Metabolome Data Base. HS increased rectal temperature (1.2°C), respiratory rate (3.5-  
40 fold) and water intake (74%), but decreased feed intake (35%) and body weight (5%) of the  
41 lactating does. No differences were detected in milk yield, but HS decreased the milk  
42 contents of fat (9%), protein (16%) and lactose (5%). Metabolomics allowed separating TN  
43 and HS urinary clusters by PLS-DA. Most discriminating metabolites were hippurate and  
44 other phenylalanine (Phe) derivative compounds, which increased in HS vs. TN does. The  
45 greater excretion of these gut-derived toxic compounds indicated that HS induced a  
46 harmful gastrointestinal microbiota overgrowth, which should have sequestered aromatic  
47 amino acids for their metabolism and decreased the synthesis of neurotransmitters and  
48 thyroid hormones, with negative impact on milk yield and composition. In conclusion, HS  
49 markedly changed the thermophysiological traits and lactational performances of dairy  
50 goats, which were translated into their urinary metabolomic profile through the presence  
51 of gut-derived toxic compounds. Hippurate and other Phe-derivative compounds are  
52 suggested as urinary biomarkers to detect heat stressed dairy animals in practice.  
53

## 54 **Introduction**

55 Exposure to high ambient temperature induces several physiological responses in order to  
56 maintain body homeostasis. Animals suffer from heat stress (HS) when physiological  
57 mechanisms fail to counterbalance an excessive heat load [1]. Exposure of dairy animals to  
58 HS results in a decline in their productive [2] and reproductive [3] performances due to a  
59 strong metabolic disruption. Dairy animals under HS typically show decreased feed intake,  
60 increased water consumption and thermophysiological traits, such as respiratory rate and  
61 rectal temperature, when compared to thermoneutral (TN). Usually, HS reduces milk yield  
62 and impairs milk composition in dairy goats [4]. Although these negative effects on milk

63 production are traditionally attributed to a decline in feed intake, pair-fed TN experiments  
64 have shown that intake only accounts for 35-50% of milk yield reduction in dairy cows [5,  
65 6]. Therefore, there is a specific effect of HS that disrupts body metabolism and milk  
66 secretion which remains unknown.

67 Biofluid assessment by Nuclear Magnetic Resonance (NMR) spectroscopy can shed  
68 some light on the physiological mechanisms occurred in animals when exposed to HS.  
69 Proton ( $^1\text{H}$ ) NMR, together with multivariate statistical analysis, has been successfully used  
70 as metabolite profiling method to study the metabolic changes in HS rats [7]. This robust  
71 and reliable technique provides vast information on metabolome dynamics and metabolic  
72 pathways [8]. The  $^1\text{H}$  NMR spectra derives from thousands of metabolite signals that  
73 usually overlap, adding complexity to data processing. Computer-based data reduction and  
74 multivariate statistical pattern recognition methods, such as principal component analysis  
75 (PCA) and partial least square–discriminant analysis (PLS-DA), have shown to be beneficial  
76 techniques to get the most from the information obtained in the  $^1\text{H}$  NMR spectra for  
77 classification purposes [9, 10].

78 To our knowledge, no studies have been carried out to evaluate urine metabolomics  
79 of dairy goats. The aim of this study was to identify the candidate biomarkers of HS  
80 through the application of  $^1\text{H}$  NMR-based metabolomic urinalysis of dairy goats.

81

## 82 **Material and methods**

### 83 **Animals and treatments**

84 Animal care conditions and management practices agreed with the procedures stated by  
85 the Ethical Committee of Animal and Human Experimentation (reference CEEAH#09/771)

86 of the Universitat Autònoma de Barcelona (UAB) and the codes of recommendations for  
87 livestock wellbeing of the Ministry of Agriculture, Food and Environment of Spain.

88 Sixteen multiparous Murciano-Granadina dairy does ( $43.5 \pm 1.6$  kg body weight),  
89 lactating and open, from the herd of the SGCE (Servei de Granges i Camps Experimentals)  
90 of the UAB in Bellaterra (Barcelona, Spain), were blocked in 2 balanced groups at mid-  
91 lactation ( $81 \pm 3$  days-in-milk;  $2.00 \pm 0.04$  L/day). Does were adapted to metabolic cages  
92 for 2 weeks before the start of the experiment and the groups randomly allocated to 2  
93 ambient conditions treatments according to a  $2 \times 2$  (treatment  $\times$  period) crossover design.  
94 Treatments were TN (indoors shelter; 15 to 20°C and  $45 \pm 5\%$  relative humidity) and HS  
95 (climatic chamber  $4 \times 6 \times 2.3$  m with temperature-humidity control system, Carel Controls  
96 Ibérica, Barcelona, Spain;  $37 \pm 0.5^\circ\text{C}$  during the day, and  $30 \pm 0.5^\circ\text{C}$  during the night;  $40 \pm$   
97  $5\%$  humidity and  $90 \text{ m}^3/\text{h}$  continuous air turnover). Day-night length was set to 12-12  
98 hours and the experimental periods lasted 21 days (14-days adaptation, 5-days  
99 measurements, 2-days washout). Temperature-humidity index (THI) calculated according  
100 to NRC (1971) resulted  $\text{THI}_{\text{TN}} = 59$  to 65 and  $\text{THI}_{\text{HS}} = 75$  to 83. Experimental conditions were  
101 similar to those detailed by Hamzaoui et al. [11].

102 Does were milked once-a-day (0800) with a portable machine (Westfalia-Separator  
103 Ibérica, Granollers, Spain) set at 42 kPa, 90 pulses/min and 66% pulsation ratio and  
104 provided with volumetric recording jars ( $3 \text{ L} \pm 5\%$ ). The milking routine included cluster  
105 attachment, machine milking, machine stripping before cluster removal, and teat dipping  
106 in an iodine solution (P3-ioshield, Ecolab Hispano-Portuguesa, Barcelona, Spain). Feed was  
107 offered ad libitum at 0930 (130% feed intake of the previous day) and consisted of a total  
108 mixed ration (dry matter, 89.9%; net energy for lactation, 1.40 Mcal/kg; crude protein,  
109 17.5%; organic matter, 87.3%; neutral detergent fiber, 34.4%; acid detergent fiber, 21.8%;

110 on dry matter basis). Ration ingredients were (as fed): alfalfa hay, 64.2%; ground barley,  
111 9.6%; beet pulp, 9.6%; ground corn, 8%; soybean meal, 3.3%; sunflower meal, 3.2%;  
112 molasses, 1%; salt, 0.6%; sodium bicarbonate, 0.3%; mineral and vitamin complex, 0.2%  
113 (Vitafac premix, DSM Nutritional Products, Madrid, Spain). Water was permanently  
114 available and offered at room temperature in water bowls connected to individual tanks of  
115 20 L. A sawdust drip tray under each water bowl was used to collect spilled water.

116

## 117 **Sampling and measurements**

### 118 **Thermophysiological traits and lactational performances of the goats**

119 Does were weighed at the start and the end of each period using an electronic scale (True-  
120 Test SR2000, Pakuranga, New Zealand; accuracy, 0.2 kg). Rectal temperature (digital  
121 clinical thermometer, ICO Technology, Barcelona, Spain; accuracy, 0.1°C) and respiratory  
122 rate (flank movements during 60 s) were recorded daily at 0800, 1200, and 1700  
123 throughout the experiment. Milk yield (volume) was recorded daily throughout the  
124 experiment and milk samples collected weekly for composition (NIRSystems 5000, Foss,  
125 Hillerød, Denmark). Feed and water intakes were calculated by weight from the daily  
126 refusals and feed samples were collected daily and composited by period for analyses.  
127 Feed composition was determined according to analytical standard methods [12].

128

### 129 **Urine sampling and preparation**

130 Urine samples from each doe were collected at micturition on the morning of day 15 of  
131 each period (n = 32) and stored at -20°C until <sup>1</sup>H NMR analysis.

132 Preparation of samples for <sup>1</sup>H NMR spectroscopy was done according to Beckonert et  
133 al. [8]. Briefly, phosphate buffer solution (pH 7.4) was prepared with sodium phosphate

134 dibasic ( $\text{Na}_2\text{HPO}_4$ ; 99.95% trace metals basis, anhydrous, Sigma-Aldrich, Germany), sodium  
135 phosphate monobasic ( $\text{NaH}_2\text{PO}_4$ ; 99.95% trace metals basis, anhydrous, Sigma-Aldrich)  
136 and sodium azide ( $\text{NaN}_3$ ; Sigma-Aldrich). Deuterium oxide ( $\text{D}_2\text{O}$ ; 99.9 atom % D, Sigma-  
137 Aldrich), containing 0.75% 3-(trimethylsilyl) propionic-2,2,3,3-d<sub>4</sub> acid (TSP) sodium salt as  
138 NMR reference compound, was added before the flask was filled up to 25 mL with milli-Q  
139 water (EMD Millipore, Darmstadt, Germany). The flask was shaken thoroughly and left in a  
140 Clifton sonicator (Nickel Electro, Weston-super-Mare, United Kingdom) at 40°C until the  
141 salts were dissolved. The prepared phosphate buffer solution was stored at 4°C. Urine  
142 samples were thawed in a water bath, thoroughly shaken and spun for 5 min at 12,000 × *g*  
143 in a swing-bucket rotor (Hettich, Tuttlingen, Germany) at 4°C. Then, 400 μL of the urine  
144 sample were transferred into Eppendorf tubes and mixed thoroughly with 200 μL of cold  
145 phosphate buffer solution. All the tubes were then centrifuged for 5 min at 12,000 × *g* at  
146 4°C and 550 μL of the final mixture transferred into 5-mm NMR tubes (VWR International  
147 Eurolab, Barcelona, Spain). The prepared NMR tubes were immediately put on ice and sent  
148 to the NMR Service of the UAB for <sup>1</sup>H High Resolution NMR Spectroscopy.

149

## 150 **NMR spectroscopy**

151 <sup>1</sup>H NMR spectra were acquired on a Bruker Avance-III spectrometer (Bruker BioSpin,  
152 Rheinstetten, Germany) operating at a <sup>1</sup>H NMR frequency of 600 MHz and a temperature  
153 of 298°K, controlled by a Burner Control Unit-extreme regulator. A 5 mm Triple Resonance  
154 Broadband Inverse probe with z-gradients and inverse detection was used and controlled  
155 by TopSpin2.1 software (Bruker, Germany). One-dimensional <sup>1</sup>H NMR spectra were  
156 obtained using an one-dimensional Nuclear Overhauser Enhancement Spectroscopy  
157 (NOESY) pulse sequence. The solvent signal was suppressed by pre-saturation during

158 relaxation and mixing time. A total of 32 scans and 2 dummy scans were performed to  
159 produce 32,768 data points for each spectrum using a relaxation delay of 2.0 s with a pulse  
160 power level of 54 dB and an acquisition time of 2.6 s. Spectral width ( $\delta$ ) used for all data  
161 collected was 12.0 ppm, and 0.3 Hz exponential line broadening was applied for the  
162 Fourier-transform of the raw data.  $^1\text{H}$  NMR spectra were phased, baseline corrected, and  
163 corrected for chemical shift registration relative to the TSP reference compound previously  
164 indicated ( $\delta = 0.0$  ppm) in TopSpin 2.1.(data in S1 File).

165

## 166 **Statistical analyses**

### 167 **Thermophysiological and performance analysis**

168 Data were analyzed by the PROC MIXED for repeated measurements of SAS v. 9.1.3 (SAS  
169 Inst. Inc., Cary, North Carolina, USA). The statistical mixed model contained the fixed  
170 effects of environmental treatment (TN vs. HS), the period (1 and 2) and measuring day (1  
171 to 19), and the random effects of the animal (1 to 16), the interactions (treatment  $\times$  day  
172 and treatment  $\times$  period), and the residual error. Differences between least squares means  
173 were determined with the PDIFF option of SAS. Significance was declared as  $P < 0.05$ .

174

### 175 **NMR data pre-processing and analysis**

176 Pre-treatment of raw spectral data is critical for generating reliable and interpretable  
177 models using multivariate analysis techniques. Nevertheless, metabolic fingerprinting  
178 datasets acquired from  $^1\text{H}$  NMR spectrometers suffer from imprecisions in chemical shifts  
179 due to temperature, pH, ionic strength and other factors. Therefore, models generated  
180 using multivariate analysis may fail to identify separations between classes, and their  
181 loadings can be difficult to interpret due to over-abundance of variables. To mitigate these

182 complications each spectrum was uniformly divided into 'bins' and the signal intensities  
183 within each bin were integrated to produce a smaller set of variables according to Worley  
184 and Powers [13]. In this way, each dataset was divided in bins of 100 (i.e., from 0.0003 to  
185 0.03 ppm) using R software v. 3.2.3 [14]. After binning, alignment and normalization of  
186 spectra were accomplished to ensure that all observations were directly comparable. In  
187 this sense, urine spectra were normalized to creatinine methyl resonance intensity at  $\delta =$   
188 3.05 ppm and then  $\log_2$  transformed. Regarding variable selection, raw  $^1\text{H}$  NMR spectral  
189 data were edited by excluding the regions outside the chemical shift range of  $\delta = 9.0$ - $0.5$   
190 ppm, and also the residual peak of the imperfect water suppression ( $\delta = 5.5$ - $4.6$  ppm).  
191 Following the recommendations of Pechlivanis et al. [15], the spectral regions of histidine,  
192 1-methylhistidine, and 3-methylhistidine ( $\delta = 8.17$ - $7.87$ ,  $\delta = 7.15$ - $7.01$ , and  $\delta = 3.77$ - $3.71$   
193 ppm, respectively) were also removed because of the sensitivity to small pH differences  
194 among urine samples.

195       Once  $^1\text{H}$  NMR pre-processing data was completed, data were subjected to  
196 multivariate statistical analysis. Initially, PCA was performed without considering the class  
197 information for samples examination and search for outliers. Then, PLS-DA with leave-one-  
198 out cross validation was also performed on the datasets using the pls package of R  
199 software [16]. PLS-DA allowed individual samples to be classified according to the  
200 respective class prior to analysis (TN or HS). Model strength was assessed using both  $R^2$   
201 and  $Q^2$  statistical parameters. While  $R^2$  values reported the total amount of variance  
202 explained by the model, the  $Q^2$  reported model accuracy as a result of cross-validation.  
203 Aside from its theoretical maximum value of 1, for biological models, an empirically  
204 inferred acceptable value is  $\geq 0.4$  [9]. The resulting  $Q^2$  statistic was compared to a null  
205 distribution to test model significance ( $P < 0.05$ ).



206 Interpretation of multivariate analysis was performed through scores and loadings  
207 plots according to its contribution to the separation between groups. For biomarker  
208 search, PLS-DA loadings were sorted by absolute values, being the first ones the  
209 metabolites responsible of the separation between experimental groups. Because both  
210 PCA and PLS-DA analysis may be influenced by variable correlations, the intra- and the  
211 inter-class variance of metabolites may have no significant differences in the one-  
212 dimensional statistical analysis [17]. For this reason, spectral bins were also selected using  
213 a Volcano plot with paired student *t* test analysis between HS over TN cohorts to get a  
214 general overview of the data ( $\log_2$  fold change thresholds,  $\leq 1.5$  and  $\geq 1.5$ ;  $P < 0.01$ ). All  $^1\text{H}$   
215 NMR data pre-processing, statistical analysis and the generated plots were performed  
216 using R software v. 3.2.3 [14].

217

### 218 **Metabolite assignment**

219 Chemical shifts linked to the highest loading values found in PLS-DA were annotated for  
220 metabolite assignment as HS biomarker candidates. The candidate chemical shifts and  
221 corresponding metabolites were assigned using the Human Metabolome Database [18]  
222 and queried in KEGG (Kyoto Encyclopedia of Genes and Genomes) database to know in  
223 which metabolic pathways they were involved.

224

225

## 226 **Results and discussion**

### 227 **Effects of heat stress on thermophysiological and lactational performances**

#### 228 **of the goats**

229 The effects of the experimental HS conditions on thermophysiological and lactational  
230 performances of the dairy goats are summarized in Table 1. Rectal temperature and  
231 respiratory rate increased during the day in both groups of does, following the expected  
232 circadian rhythm and the daily THI pattern in both TN and HS conditions. The greatest  
233 values were observed in the HS does at 1700, the increases being 1.2°C and 3.5-fold  
234 ( $P<0.001$ ) when compared to TN does. On average, feed intake decreased 35% in HS  
235 ( $P<0.001$ ) when compared to TN does but, in contrast, water consumption increased 74%  
236 ( $P<0.001$ ). Furthermore, HS does lost 115 g/d of body weight, whereas TN goats won 162  
237 g/d, on average ( $P<0.001$ ). Obtained results agreed with those reported for the same  
238 breed of dairy goats in late-lactation and under similar HS conditions [11].

239 Reducing feed intake is a way to decrease heat production in warm environments  
240 because heat increment of feeding, especially in ruminants, is an important source of heat  
241 production [4]. Moreover, increased water consumption under HS conditions is mainly  
242 used for boosting latent heat losses by evaporation (e.g., sweating and panting). Despite  
243 this, no differences in milk yield were observed, although milk composition markedly  
244 worsened. Milk fat, protein and lactose contents varied by -9%, -16% and -5%,  
245 respectively (Table 1;  $P<0.01$ ), which would severely compromise the milk transformation  
246 to dairy products [19]. Consequently with the decrease in milk composition, fat corrected  
247 milk yield also varied by -14% ( $P<0.05$ ).

248

249 **Table 1. Thermophysiological and lactational performances of dairy goats under thermal**  
250 **neutral (TN) and heat stress (HS) conditions. Values are least square means and standard**  
251 **error of the means (SEM).**

| Item                                 | Treatment |      | SEM  | P value |
|--------------------------------------|-----------|------|------|---------|
|                                      | TN        | HS   |      |         |
| <b>Rectal temperature, °C</b>        |           |      |      |         |
| 0800                                 | 38.5      | 39.1 | 0.08 | <0.001  |
| 1200                                 | 38.7      | 39.7 | 0.07 | <0.001  |
| 1700                                 | 38.7      | 39.9 | 0.09 | <0.001  |
| <b>Respiratory rate, breaths/min</b> |           |      |      |         |
| 0800                                 | 27        | 69   | 4    | <0.001  |
| 1200                                 | 39        | 131  | 6    | <0.001  |
| 1700                                 | 37        | 130  | 6    | <0.001  |
| <b>Performances</b>                  |           |      |      |         |
| Dry matter intake, kg/d              | 2.26      | 1.47 | 0.09 | <0.001  |
| Water intake, L/d                    | 6.1       | 10.6 | 1.0  | <0.001  |
| Final body weight, kg                | 48.6      | 39.8 | 1.8  | <0.001  |
| Body weight variation, kg            | 3.5       | -2.1 | 1.0  | <0.001  |
| Milk yield, L/d                      | 1.88      | 1.79 | 0.11 | 0.413   |
| FCM <sup>1</sup> yield, L/d          | 2.17      | 1.86 | 0.13 | 0.017   |
| <b>Milk composition, %</b>           |           |      |      |         |
| Fat                                  | 3.98      | 3.64 | 0.13 | 0.009   |
| Protein                              | 3.40      | 2.85 | 0.10 | <0.001  |
| Lactose                              | 4.51      | 4.30 | 0.07 | 0.003   |

252 <sup>1</sup>Fat corrected milk at 3.5%; FCM = L × [0.432 + 0.162 × (fat, %)], being L liters of milk.

253 Although our does were less sensitive to HS than dairy cows with regard to feed intake  
254 and milk yield, the effects of HS on milk fat content and fat corrected milk were  
255 contradictory when compared to cows. So, despite the typical fat depression seen in  
256 commercial dairy cow farms during the summer, Rhoads et al. [5] and Shwartz et al. [20]  
257 reported 9% increase or no change in milk fat content, at the short- or mid-term,  
258 respectively, in HS vs. TN dairy cows. On the other hand, the above indicated negative  
259 effect of HS on the milk protein content of our goats (i.e., -16%), was greater than

260 reported by Rhoads et al. ([5], -5%) and Shwartz et al. ([20], -9%) in dairy cows, and  
261 herewith in the same breed of dairy goats in late lactation ([11], -13%). The negative  
262 effects of HS on the lactational performances of dairy ruminants are usually attributed to  
263 the decline in feed intake, but pair-fed experiments under TN conditions have shown that  
264 feed intake only explains approximately a half of the fall in milk yield and body weight in  
265 dairy cows [5, 6]. Therefore, similar responses were expected in our dairy goats.

266 As an intermediate conclusion, the thermophysiological and lactational performance  
267 responses observed, clearly evidenced that our HS does (kept at THI = 75 to 83) were  
268 under severe stress on the days at which the urine samples for <sup>1</sup>H NMR-metabolomics  
269 assessment were collected (day 15).

## 270 **NMR urinary spectroscopy of the goats**

271 Comparison of <sup>1</sup>H NMR urinary mean spectra for the TN and HS lactating does is shown in  
272 Fig 1. Resonance assignments reported in the figure were made from the known chemical  
273 shifts and coupling patterns of urine spectra previously described in humans [14, 21].

274 **Fig 1. One-dimensional <sup>1</sup>H NMR spectra at 600 MHz of urine from representative**  
275 **thermoneutral (TN) and heat stressed (HS) dairy does. Dominant metabolites were: 1,**  
276 **creatinine; 2, creatine; 3, trimethyl-N-oxide; 4, urea; 5, branched-chain amino acids and**  
277 **organic acids; 6, glycine; 7, allantoin; 8, alanine; 9, N-acetyl glycoprotein; 10, glutamate;**  
278 **11, succinic acid; 12, citric acid; 13, aromatic signals; 14, hippuric acid.**

279 **S1 Table. <sup>1</sup>H NMR data matrix of normalized and binned spectral data. HS, heat-stressed**  
280 **lactating dairy does; TN, thermal neutral lactating dairy does.**

281 At first sight, visible differences in urine metabolites were found between HS and TN  
282 groups. Spectral region from  $\delta = 8.0$ - $6.5$  ppm showed higher excretion compounds in the

283 HS doe group. On the contrary, all excreted compounds that lay on the  $\delta = 4.5-0.5$  ppm  
284 spectral region appeared to be at lower concentrations in the HS group. More detailed  
285 analysis of metabolic differences between these two thermal conditions were obtained  
286 from the multivariate PCA and PLS-DA data analyses and the Volcano plot.

287 First, the Volcano plot (Fig 2) showed that TN does excreted a greater number of  
288 urinary metabolites (i.e., higher number of left-sided spots) than HS does. Most probably,  
289 this was a consequence of the metabolic sparing of nutrients of the HS does, which loosed  
290 weight as a result of their negative energy balance, to cope with the HS conditions.

291 **Fig 2. Volcano plot based on fold change ( $\log_2$ ) and P value ( $-\log_{10}$ ) of all spectral bins of**  
292  **$^1\text{H}$  NMR urinary spectroscopy of thermoneutral (TN) and heat stressed (HS) lactating**  
293 **dairy does. Red circles indicate the spectral bins that showed significant changes and**  
294 **absolute fold changes greater than 1.5.**

295 Regarding the multivariate analysis, PCA was initially applied to the  $^1\text{H}$  NMR spectra.  
296 Based on the principle of minimum differentiation, no samples were identified as outliers  
297 according to Hotelling's  $T^2$  (95% interval of confidence). Therefore, all samples remain for  
298 subsequent PLS-DA in order to identify the metabolic differences between HS and TN dairy  
299 does. The PLS-DA scores plot showed a slight distinguishable separation between HS and  
300 TN datasets (Fig 3).

301 **Fig 3. PLS-DA scores plot of the first two principal components of  $^1\text{H}$  NMR urinary spectra**  
302 **of thermoneutral (TN) and heat stressed (HS) lactating dairy does.**

303 The separation along the x-axis (PLS-DA component 1) represents differences related  
304 to the environmental treatment. All other variations in the NMR data are visualized as  
305 separation in the y-axis direction (second component). The cross-validation of plasma

306 metabolomics PLS-DA models (first 2 components) gave  $R_x^2 = 0.54$ ,  $R_y^2 = 0.17$ , and  $Q^2 =$   
 307 0.47. The  $R^2$  and  $Q^2$  values in the model were higher than in the random model ( $P < 0.01$ ).  
 308 The top-ranking urinary metabolites responsible for discriminating HS does were hippurate  
 309 ( $\delta = 7.54$  ppm, 7.83 ppm and 7.63 ppm) and the phenylalanine (Phe) derivative  
 310 compounds OH-phenylacetate ( $\delta = 7.27$  ppm), OH-phenylacetyl glycine ( $\delta = 7.20$  ppm) and  
 311 phenylglyoxylate ( $\delta = 7.62$  ppm). All of them were excreted in greater concentrations in  
 312 the urine of HS when compared to TN does. Table 2 shows the excreted metabolites with  
 313 the greatest quantitatively change under HS conditions, according to the results of the  
 314 univariate and multivariate analyses.

315 As it can be observed, of them come from certain gastrointestinal bacteria that  
 316 generate uremic toxins that are absorbed into the blood and mainly cleared by the kidney  
 317 [22, 23]. The greater excretion of these metabolites, also known as gut-derived uremic  
 318 toxins and mammalian-microbial cometabolites [24], may be related to an abnormal  
 319 overgrowth of gastrointestinal microbiota that is commonly accompanied with intestinal  
 320 hyper-permeability [23, 25, 26].

321

322 **Table 2. Selected metabolites contributing to the classification of the urine metabolome**  
 323 **of thermoneutral and heat stressed lactating dairy does.**

| Pathway                                         | Chemical shift<br>( $\delta$ , ppm) | Metabolite       | Fold<br>change* | P value |
|-------------------------------------------------|-------------------------------------|------------------|-----------------|---------|
| Phenylalanine (Phe)<br>metabolism               | 7.83, 7.63, 7.54                    | Hippurate        | 2.74            | <0.001  |
| Microbial metabolism in<br>diverse environments | 7.62                                | Phenylglyoxylate | 1.59            | <0.001  |
|                                                 | 7.27                                | OH-phenylacetate | 1.51            | <0.001  |

|                           |      |                        |      |        |
|---------------------------|------|------------------------|------|--------|
| Tyrosine (Tyr) metabolism | 7.20 | OH-phenylacetylglycine | 2.16 | <0.001 |
|---------------------------|------|------------------------|------|--------|

324

325 \* Metabolites with positive fold change values means that they are excreted in greater  
326 concentrations under heat stress conditions

327

328 The increase of gut-derived uremic toxins reflected alterations in the gastrointestinal  
329 environment due to the metabolic impact of HS. In fact, it is well known that under HS  
330 conditions, mammals redistribute blood to the periphery for heat dissipation purposes,  
331 while vasoconstriction occurs in the gastrointestinal tract [27] that leads to tissue hypoxia  
332 and oxidative stress [28]. Moreover, lower rumen pH has been reported as a side effect in  
333 HS goats [29] and it may compromise the integrity of the gastrointestinal tract barrier [2].

334 Hippurate and other Phe-derivative compounds are produced by the aerobic and  
335 anaerobic degradations of aromatic amino acids (e.g., Phe and Tyr) and dietary  
336 polyphenols by the gastrointestinal microbiota [22, 30, 31]. Although they are usually  
337 found in plasma and excreted in urine by crossing the cellular and tissue barriers  
338 (gastrointestinal epithelium, lymphatic barrier and liver), high levels of Phe-derivatives in  
339 urine are related to gastrointestinal leaky stages [32]. Moreover, high levels of gut-derived  
340 uremic toxins seem to affect both the cellular protein expression and the activity of the  
341 cyclooxygenase-2 (COX-2) enzyme, which plays a major role in the regulation of  
342 inflammation through the production of prostaglandins; so, when COX-2 activity is speed  
343 up, inflammation increased [33]. Some Phe-derivatives also produce cytotoxic effects by  
344 the inhibition of cell pores opening and the production of reactive oxygen species [34].

345 Among Phe-derivatives, hippurate has a strong association with diet and  
346 gastrointestinal microbiota and its production requires of both microbial and mammalian  
347 metabolisms [24]. Gastrointestinal bacteria produce benzoic acid from dietary aromatic

348 compounds, which is absorbed into the blood. Because of the toxicity of benzoic acid, it is  
349 conjugated with glycine in the mitochondrial matrix of the liver and renal cortex to form  
350 hippuric acid [24, 25], which is later filtered in the kidneys and finally excreted in urine as  
351 hippurate [24, 35]. The main elimination route for hippurate is the active renal tubular  
352 secretion and its disruption results in its accumulation in the blood [24]. Hippurate is a  
353 uremic toxin that participates in the correction of metabolic acidosis by stimulating  
354 ammoniogenesis, a dominant and adaptive mechanism of proton excretion. Moreover, it  
355 interferes several metabolic processes, such as: inhibition of glucose utilization by the  
356 kidney and muscle, modulation of fatty acid metabolism and regulation of acid-base  
357 balance by stimulating kidney's ammoniogenesis, among others, as reviewed by Dzurik et  
358 al. [35].

359 It might also be noted that, additionally to the production of gut-derived uremic toxins  
360 from dietary aromatic amino acids by the gastrointestinal microbiota, Phe is known to be  
361 an essential amino acid for most animals, including ruminants [36]. It is also the precursor  
362 of Tyr, that is essential for the synthesis of thyroid hormones and levodopa  
363 neurotransmitter. Previous studies have evidenced a strong decrease in plasma thyroid  
364 hormones (i.e., TSH, T4 and T3) of steers under HS conditions [37], which means that the  
365 basal heat production may in fact decrease when Phe and Tyr are scarce. Moreover, the  
366 rate of milk production is markedly affected by thyroid hormones, which modulate the  
367 nutrient partitioning towards milk production [38]. On the other hand, a decrease in the  
368 dopaminergic neurons activity was also observed in HS calves [39]. The drop of levodopa  
369 synthesis may be the result of the hypersecretion of its antagonist prolactin, as observed  
370 in response to HS in goats [40], ewes [41] and cows [42]. Prolactin is not only a hormone  
371 related to milk production, but has a broad variety of biological functions related to



372 thermoregulation and water balance. The increase in plasma prolactin is not reflected in  
373 an increase in milk yield, as seen in dairy ruminants under HS conditions [11, 43]. Alamer  
374 [44] concluded that the mammary gland experiences a down-regulation of prolactin  
375 signaling pathways that could partially explain the depressed milk production of dairy  
376 cows during HS.

## 377 **Conclusions**

378 Heat stress caused marked changes in thermophysiological traits and lactational  
379 performances of dairy goats, which were translated into their <sup>1</sup>H NMR metabolomic  
380 urinary profile. These changes were related to the over-excretion of gut-derived toxic  
381 compounds generated by the gastrointestinal microbiota with expected decreases in the  
382 bioavailability of aromatic amino acids and impairment of the synthesis of thyroid  
383 hormones and neurotransmitters (i.e., levodopa, serotonin), which compromised the milk  
384 production of dairy goats. In practice, the use of hippurate and other phenylalanine  
385 derivatives are suggested as urinary biomarkers to identify heat stressed animals.

## 386 **Acknowledgements**

387 The authors are grateful to the technical team of SGCE (Servei de Granges i Camps  
388 Experimentals) of the UAB for the care of the animals.

389

## 390 **References**

- 391 1. Bernabucci U, Lacetera N, Baumgard LH, Rhoads RP, Ronchi B, Nardone A.  
392 Metabolic and hormonal acclimation to heat stress in domesticated  
393 ruminants. *Anim.* 2010;4:1167–83. pmid: 22444615.  
394 2. Baumgard LH, Rhoads RP. Effects of heat stress on postabsorptive metabolism  
395 and energetics. *Annu Rev Anim Biosci.* 2013;1:311–37. pmid: 25387022.

- 396  
397  
398  
399  
400  
401  
402  
403  
404  
405  
406  
407  
408  
409  
410  
411  
412  
413  
414  
415  
416  
417  
418  
419  
420  
421  
422  
423  
424  
425  
426  
427  
428  
429  
430  
431  
432  
433  
434  
435  
436  
437  
438  
439  
440  
441  
442
3. Hansen PJ. Effects of heat stress on mammalian reproduction. *Philos Trans R Soc Lond B Biol Sci.* 2009; 364:3341–50. pmid: 19833646.
  4. Salama AAK, Caja G, Hamzaoui S, Badaoui B, Castro-Costa A, Façanha DE et al. Different levels of response to heat stress in dairy goats. *Small Rumin. Res.* 2014;121:73–9.
  5. Rhoads ML, Rhoads RP, VanBaale MJ, Collier RJ, Sanders SR, Weber WJ et al. Effects of heat stress and plane of nutrition on lactating Holstein cows: I. Production, metabolism, and aspects of circulating somatotropin. *J Dairy Sci.* 2009;92:1986–97. pmid: 19389956.
  6. Wheelock JB, Rhoads RP, VanBaale MJ, Sanders SR, Baumgard LH. Effects of heat stress on energetic metabolism in lactating Holstein cows. *J Dairy Sci.* 2010;93:644–55. pmid: 20105536.
  7. Ippolito DL, Lewis JA, Yu C, Leon LR, Stallings JD. Alteration in circulating metabolites during and after heat stress in the conscious rat: potential biomarkers of exposure and organ-specific injury. *BMC Physiol.* 2014;14:14. pmid: 25623799.
  8. Beckonert O, Keun HC, Ebbels TMD, Bundy J, Holmes E, Lindon JC et al. Metabolic profiling, metabolomic and metabonomic procedures for NMR spectroscopy of urine, plasma, serum and tissue extracts. *Nature Protocols.* 2007;2:2692–703. pmid: 18007604.
  9. Westerhuis JA, Hoefsloot HCJ, Smit S, Vis DJ, Smilde AK, van Velzen EJJ et al. Assessment of PLSDA cross-validation. *Metabolomics.* 2008;4:81–9.
  10. Yamamoto H, Yamaji H, Abe Y, Harada K, Waluyo D, Fukusaki E et al. Dimensionality reduction for metabolome data using PCA, PLS, OPLS, and RFDA with differential penalties to latent variables. *Chemom Intell Lab Syst.* 2009;98:136–42.
  11. Hamzaoui S, Salama AAK, Albanell E, Such X, Caja G. Physiological responses and lactational performances of late lactating dairy goats under heat stress conditions. *J Dairy Sci.* 2013;96:6355–65. pmid: 23958010.
  12. AOAC (2003) Official Methods of Analysis of the Association of Official's Analytical Chemists. 17th Edition, Association of Official Analytical Chemists (AOAC), Arlington, Virginia.
  13. Worley B, Powers R. Multivariate analysis in metabolomics. *Curr Metabolomics.* 2013;1:92–107. pmid: 26078916.
  14. R Core Team. R: A language and environment for statistical computing. R Foundation for Statistical Computing, Vienna, Austria. 2015. URL <https://www.R-project.org/>.
  15. Pechlivanis A, Kostidis S, Saraslanidis P, Petridou A, Tsalis G, Mougios V et al. H-1 NMR-Based Metabonomic Investigation of the Effect of Two Different Exercise Sessions on the Metabolic Fingerprint of Human Urine. *J Proteome Res.* 2010;9:6405–16. pmid: 20932058.
  16. Mevik B, Wehrens R., Hovde Liland K. Pls: Partial Least Squares and Principal Component Regression. R package version 2.5-0. 2015. Available from: <http://CRAN.R-project.org/package=pls>.
  17. Ji P, Wei Y, Hua Y, Zhang X, Yao W, Ma Q et al. A novel approach using metabolomics coupled with hematological and biochemical parameters to explain the enriching-blood effect and mechanism of unprocessed Angelica

- 443 sinensis and its 4 kinds of processed products. *J Ethnopharmacol* .  
444 2017;211:101–16. pmid: 28958590.
- 445 **18.** Wishart DS, Knox C, Guo AC. 2009. HMDB: a knowledgebase for the human  
446 metabolome. *Nucleic Acids Res*. 2009;37 (Database Issue):D603–610. pmid:  
447 18953024.
- 448 **19.** Salama AAK, Caja G, Hamzaoui S, Such X, Albanell E, Badaoui B et al. 2016. Chap.  
449 2. Thermal stress in ruminants: Responses and strategies for alleviation. In:  
450 *Animal Welfare in Extensive Systems*. J. Villalba, X. Manteca (eds.). The animal  
451 Welfare Series, 5M Publishing, Sheffield, UK, pp. 11–34.
- 452 **20.** Shwartz G, Rhoads ML, VanBaale MJ, Rhoads RP, Baumgard LH. Effects of a  
453 supplemental yeast culture on heat-stressed lactating Holstein cows. *J*  
454 *Dairy Sci*. 2009;92:935–42. pmid: 19233786.
- 455 **21.** Bouatra S, Aziat F, Mandal R, Guo AC, Wilson MR, Knox C et al. The human urine  
456 metabolome. *PLoS One* 2013;8:e73076. 10.1371/journal.pone.0073076. pmid:  
457 24023812.
- 458 **22.** Martin AK. The origin of urinary aromatic compounds excreted by ruminants. 1.  
459 The metabolism of quinic, cyclohexanecarboxylic and non-phenolic aromatic  
460 acids to benzoic acid. *British J Nutr*. 1982;47:139–54. pmid: 7059566.
- 461 **23.** Ramezani A, Raj DS. The gut microbiome, kidney disease, and targeted  
462 interventions. *J Am Soc Nephrol*. 2014;25: 657–70. pmid: 24231662.
- 463 **24.** Lees HJ, Swann JR, Wilson ID, Nicholson JK, Holmes E. Hippurate: the natural  
464 history of a mammalian-microbial cometabolite. *J Proteome Res*. 2013;12:1527-  
465 46. pmid: 23342949.
- 466 **25.** Nicholson JK, Holmes E, Wilson ID. Gut microorganisms, mammalian metabolism  
467 and personalized health care. *Nat Rev Microbiol*. 2005;3:431–8. pmid:  
468 15821725.
- 469 **26.** Pearce SC, Mani V, Weber TE, Rhoads RP, Patience JF, Baumgard LH, Gabler NK.  
470 Heat stress and reduced plane of nutrition decreases intestinal integrity and  
471 function in pigs. *J Anim Sci*. 2013;91:5183–93. pmid: 23989867.
- 472 **27.** Kregel KC, Wall PT, Gisolfi CV. Peripheral vascular responses to hyperthermia in  
473 the rat. *J Appl Physiol*. 1988;64:2582–8. pmid: 340344.
- 474 **28.** Lambert GP. Stress-induced gastrointestinal barrier dysfunction and its  
475 inflammatory effects. *J Anim Sci*. 2009;97(14 Suppl):E101–8. pmid: 18791134.
- 476 **29.** Castro-Costa A, Salama AAK, Moll X, Aguiló J, Caja G. Using wireless rumen  
477 sensors for evaluating the effects of diet and ambient temperature in  
478 nonlactating dairy goats. *J Dairy Sci*. 2015;98:4646–58. pmid: 25958285.
- 479 **30.** Macfarlane GT, Macfarlane S. Human colonic microbiota: ecology, physiology  
480 and metabolic potential of intestinal bacteria. *Scand J Gastroenterol*. 1997;32  
481 (Suppl 222):3–9. pmid: 9145437.
- 482 **31.** Pallister T, Jackson MA, Martin TC, Zierer J, Jennings A, Mohny RP, MacGregor  
483 A, Steves CJ, Cassidy A, Spector TD, Menni C. Hippurate as a metabolomic  
484 marker of gut microbiome diversity: Modulation by diet and relationship to  
485 metabolic syndrome. *Sci Rep*. 2017;7:13670. pmid: 29057986.
- 486 **32.** Fedotcheva NI, Kazakov RE, Kondrashova MN, Beloborodova NV. Toxic effects of  
487 microbial phenolic acids on the functions of mitochondria. *Toxicol Lett*.  
488 2008;180:182–8. pmid: 18634861.

- 489  
490  
491  
492  
493  
494  
495  
496  
497  
498  
499  
500  
501  
502  
503  
504  
505  
506  
507  
508  
509  
510  
511  
512  
513  
514  
515  
516  
517  
518  
519  
520  
521  
522  
523  
524  
525
33. Karlsson PC, Huss U, Jenner A, Halliwell B, Bohlin L, Rafter JJ. Human fecal water inhibits COX-2 in colonic HT-29 cells: role of phenolic compounds. *J Nutr.* 2005;135:2343–9. pmid: 16177193.
  34. Galati G, Lin A, Sultan AM, O'Brian PJ. Cellular and in vivo hepatotoxicity caused by green tea phenolic acids and catechins. *Free Radic Biol Med.* 2006;40:570–80. pmid: 16458187.
  35. Dzúrik R, Spustová V, Krivosíková Z, Gazdíková K. Hippurate participates in the correction of metabolic acidosis. *Kidney Int.* 2001;78:S278–81. pmid: 11169026.
  36. Patton RA, Hristov AN, Parys C, Lapierre H. Relationships between circulating plasma concentrations and duodenal flows of essential amino acids in lactating dairy cows. *J Dairy Sci.* 2015;98: 4707–34. pmid: 25912872.
  37. Kahl S, Elsasser TH, Rhoads RP, Collier RJ, Baumgard LH. Environmental heat stress modulates thyroid status and its response to repeated endotoxin challenge in steers. *Domest Anim Endocrinol.* 2015;52:43–50. pmid: 25804834.
  38. Hurley WL. Adrenal and thyroid hormones; 2010 [cited 25 July 2018]. In: Lactation biology website. University of Illinois, Urbana-Champaign, IL. Available from: <http://ansci.illinois.edu/static/ansc438/Lactation/adrenalthyroid.html>
  39. Tucker HA, Chapin LT, Lookingland KJ, Moore KE, Dahl GE, Evers JM. Temperature effects on serum prolactin concentrations and activity of dopaminergic neurons in the infundibulum/pituitary stalk of calves. *Proc Soc Exp Biol Med.* 1991;197:74–6. pmid: 1902294.
  40. Sergent D, Berbigier P, Kann G, Ravault JP. Effect of prolactin inhibition on thermo-physiological parameters and on plasma prolactin and cortisol concentrations in male Creole goats. *Reprod Nutr Dev.* 1985;25:629–40.
  41. Colthorpe KL, Anderson ST, Martin GB, Curlewis JD. Hypothalamic dopamine D1 receptors are involved in the stimulation of prolactin secretion by high environmental temperature in female sheep. *J Neuroendocrinol.* 1998;10:503–9. pmid: 9700677.
  42. Ronchi B, Stradaoli G, Supplizi AV, Bernabucci U, Lacetera N. Influence of heat stress or feed restriction on plasma progesterone, oestradiol-17b, LH, FSH, prolactin and cortisol in Holstein heifers. *Livest. Prod Sci.* 2001;68:231–41.
  43. Gao ST, Guo J, Quan SY, Nan XM, Fernández MVS, Baumgard LH, Bu DP. The effects of heat stress on protein metabolism in lactating Holstein cows. *J Dairy Sci.* 2017;100:5040–9. pmid: 28390717.
  44. Alamer M. The role of prolactin in thermoregulation and water balance during heat stress in domestic ruminants. *Asian J Anim Vet Adv.* 2011;6:1153–69.

## 526 **Supporting information**

- 527 S1 Dataset. <sup>1</sup>H NMR data matrix of normalized and binned spectral data. HS, heat-stressed  
528 lactating dairy does; TN, thermal neutral lactating dairy does.

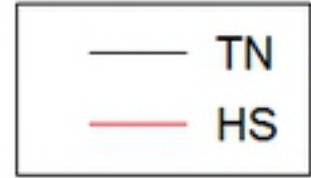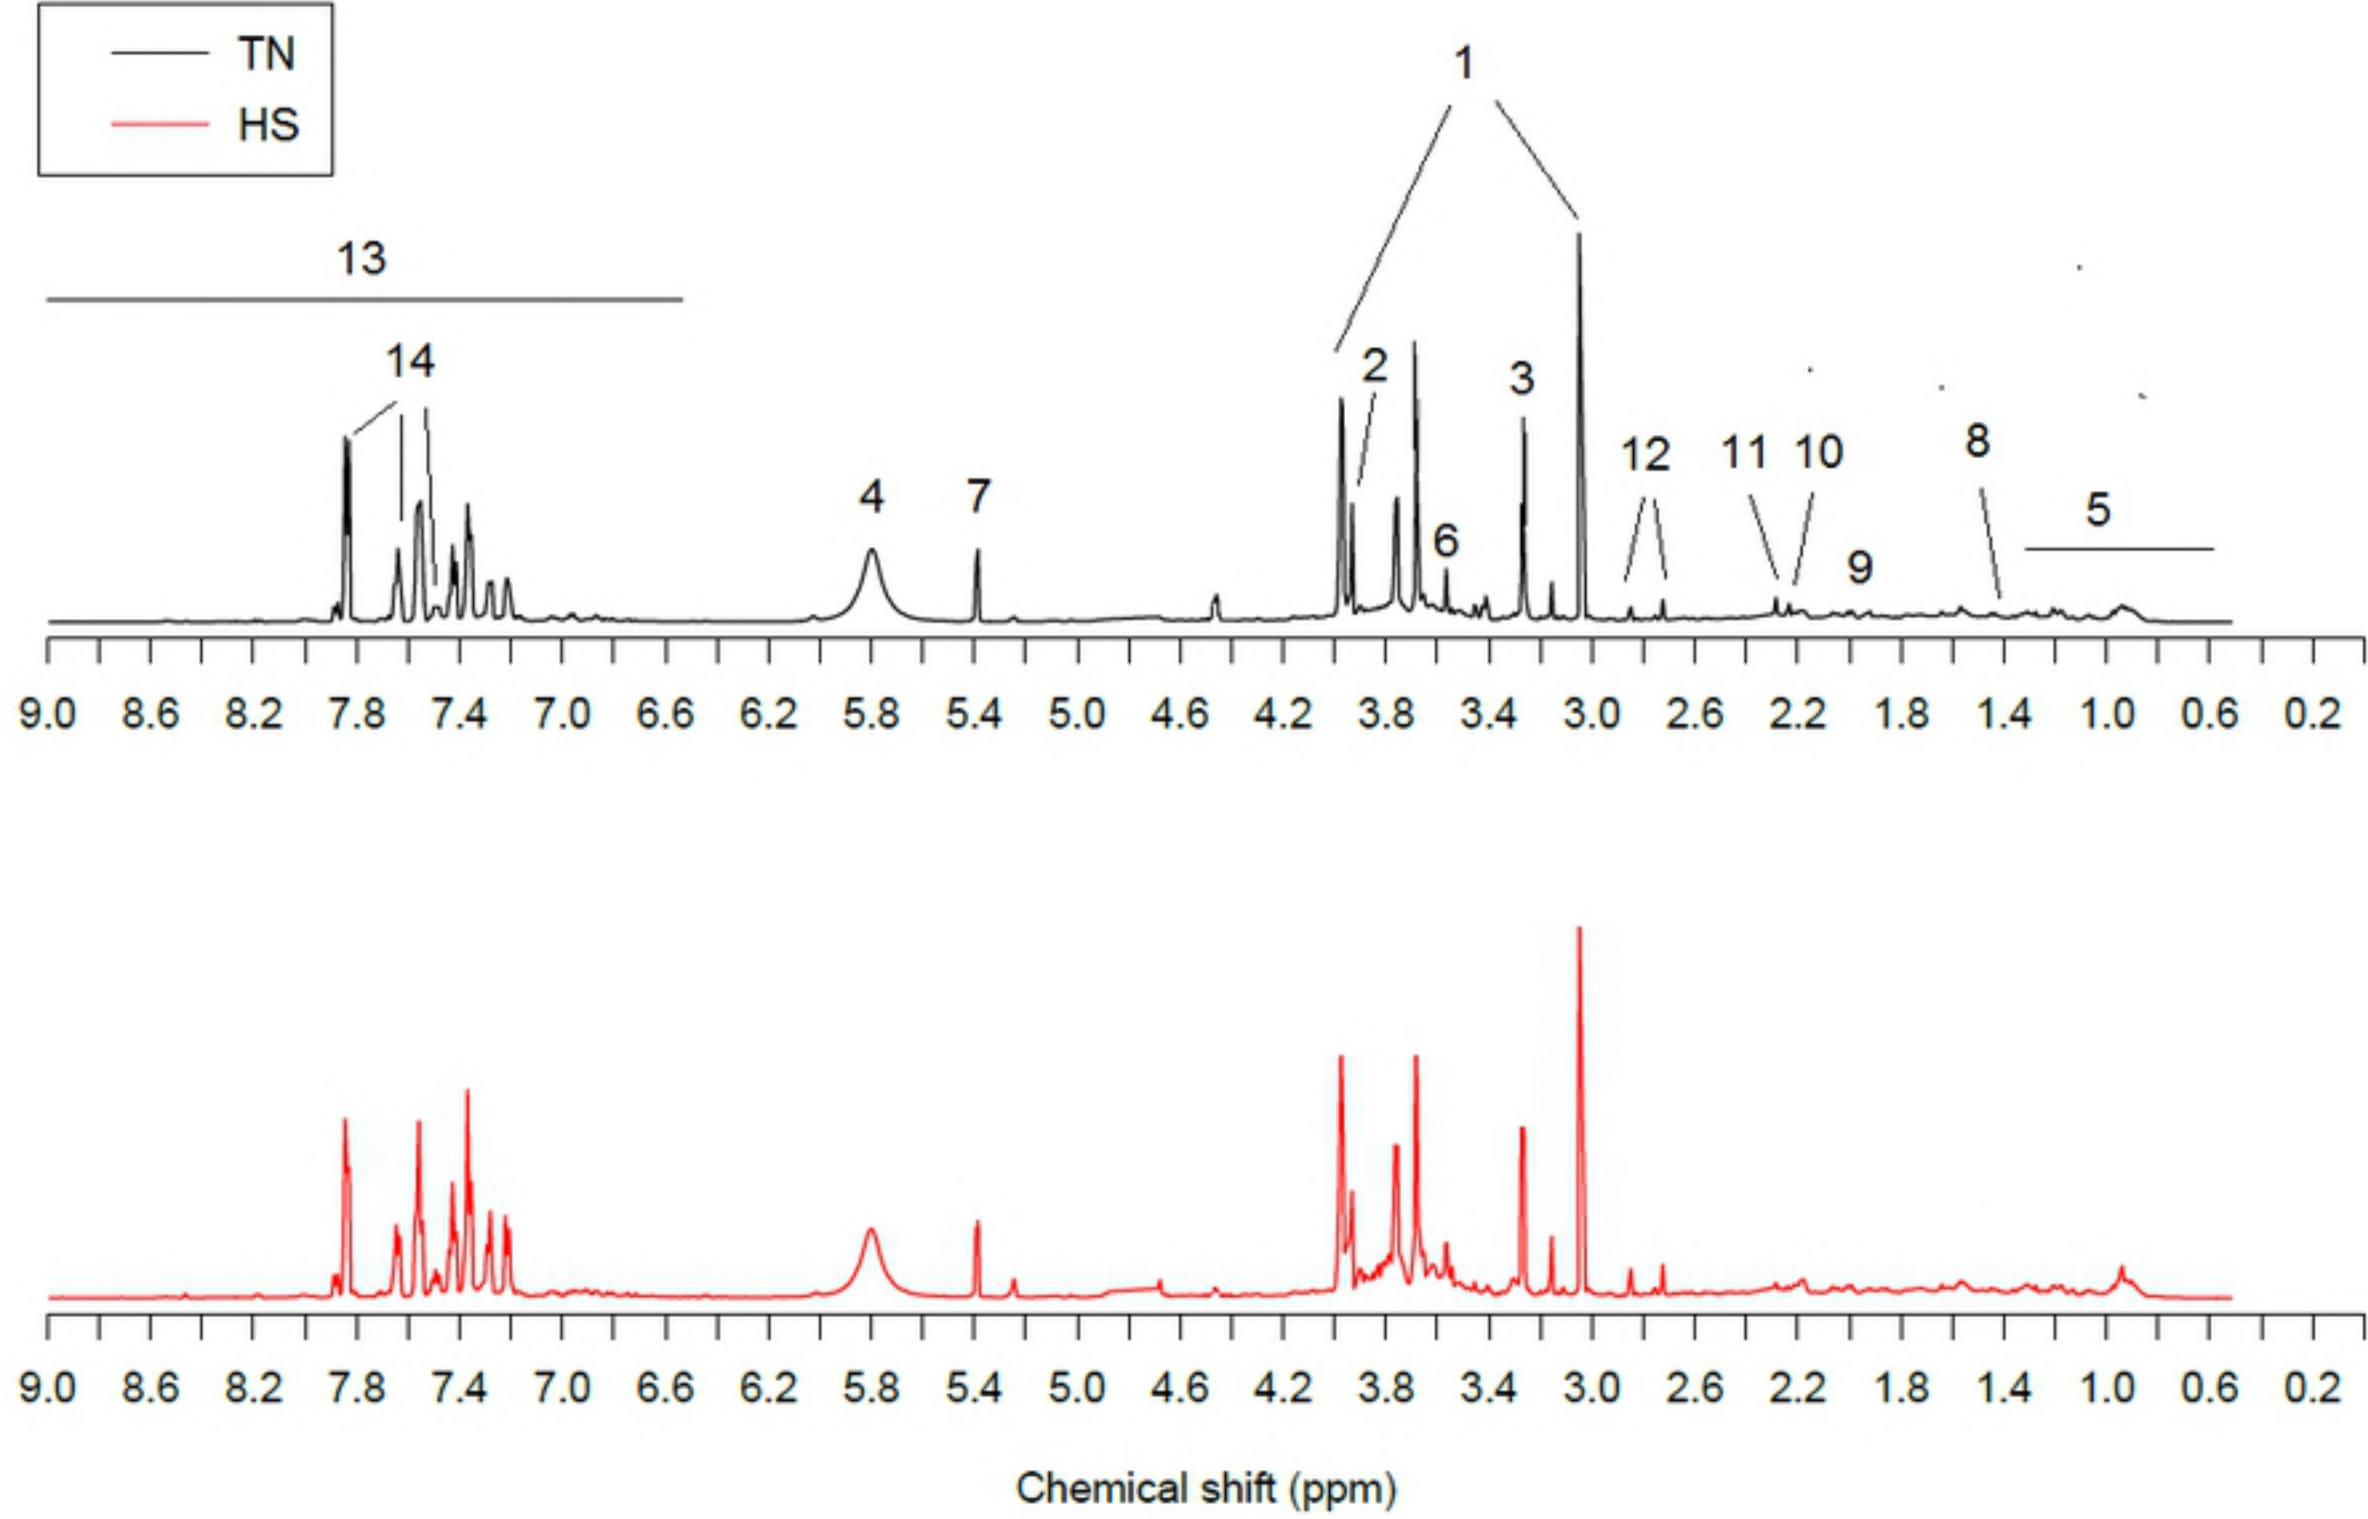

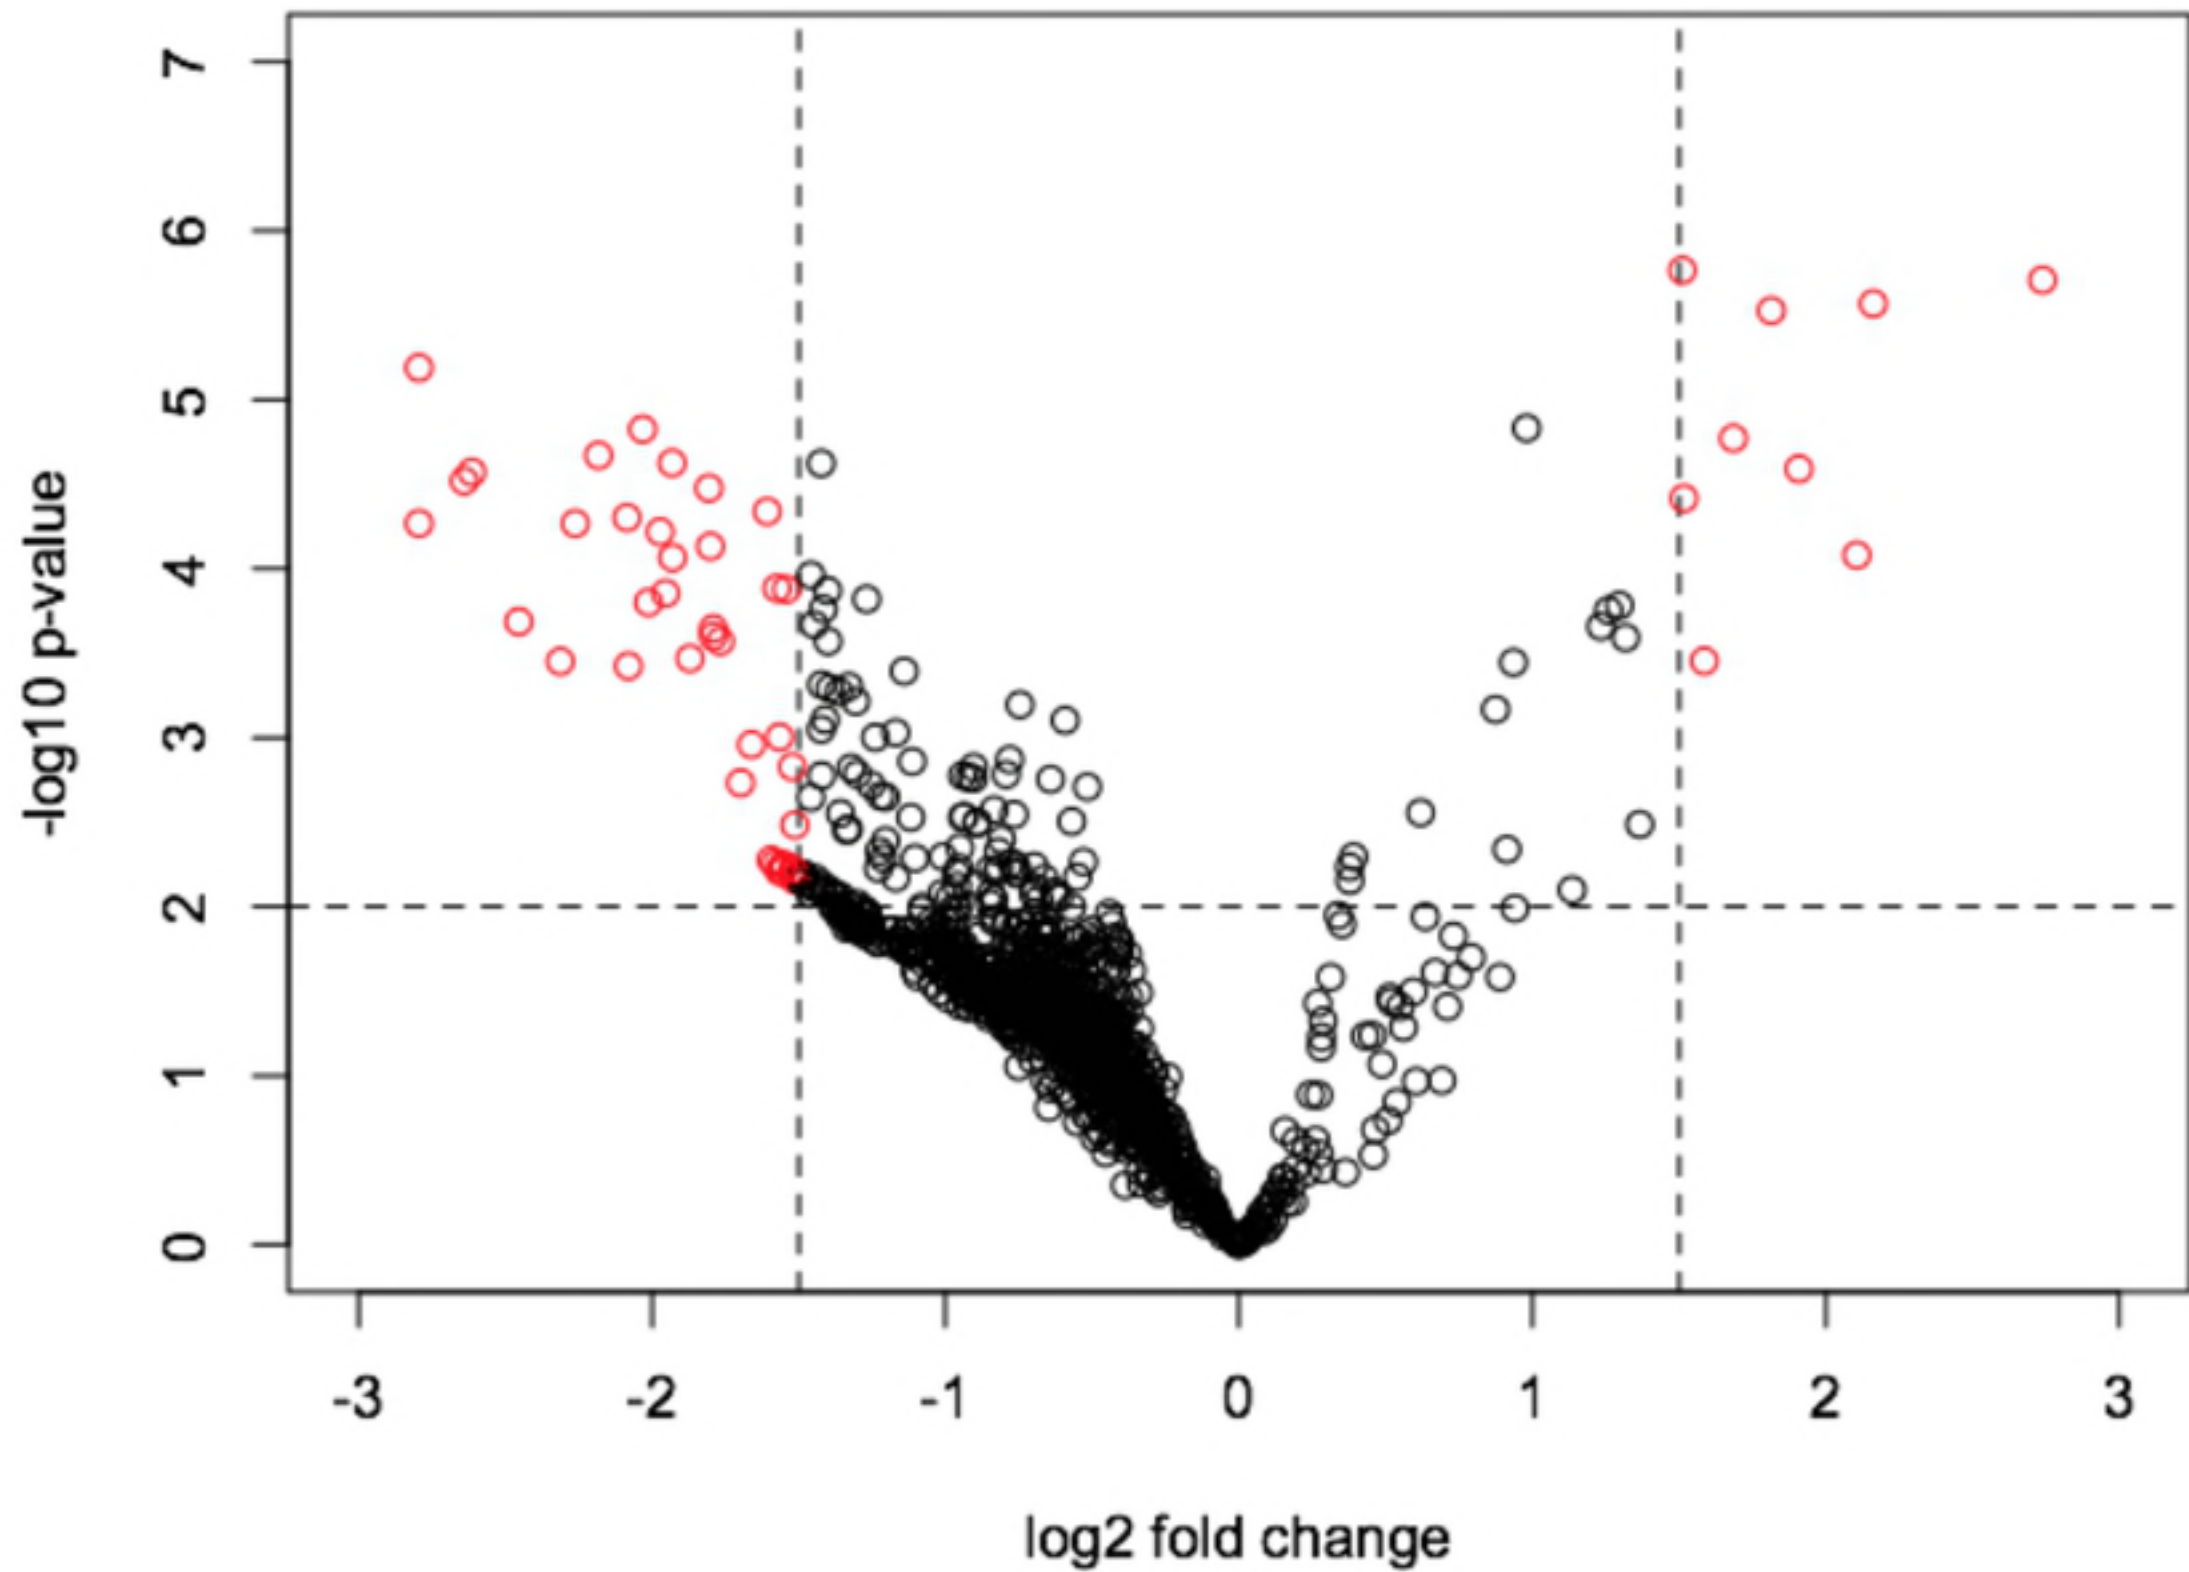

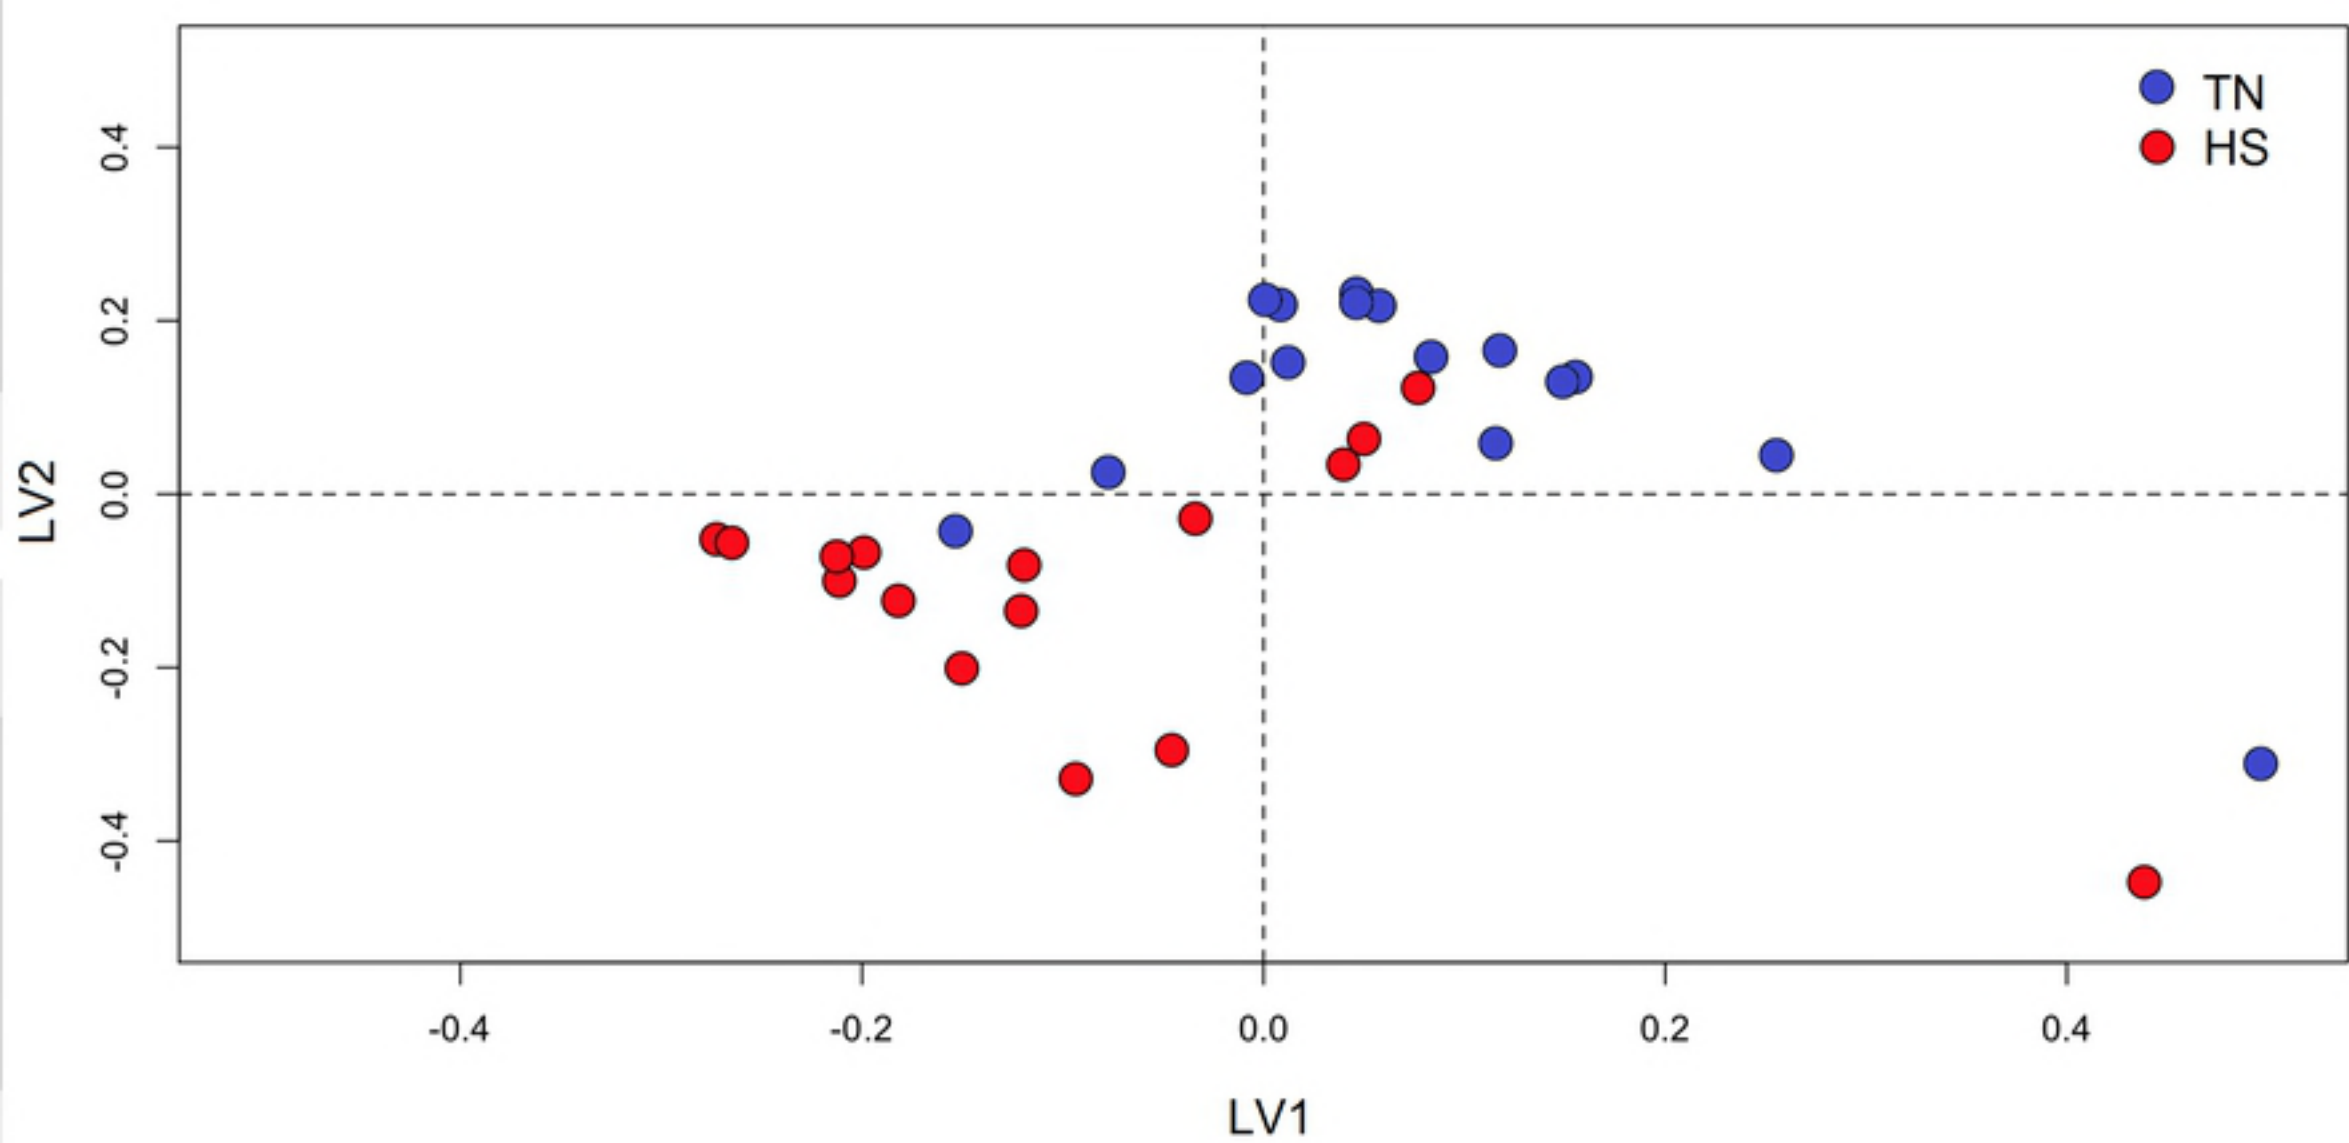

Source: https://www.biorxiv.org/content/10.1101/385930v1.full.pdf
